# Supplementary material for: PYK2 mediates the BRAF inhibitor (vermurafenib)-induced invadopodia formation and metastasis in melanomas
Source: PubMed Central journal article supplement (PMC9425182; doi:10.20892/j.issn.2095-3941.2020.0294), 2021-09-28
Supplement: cbm-19-1211-s001.pdf [file cbm-19-1211-s001.pdf]

## Supplementary materials

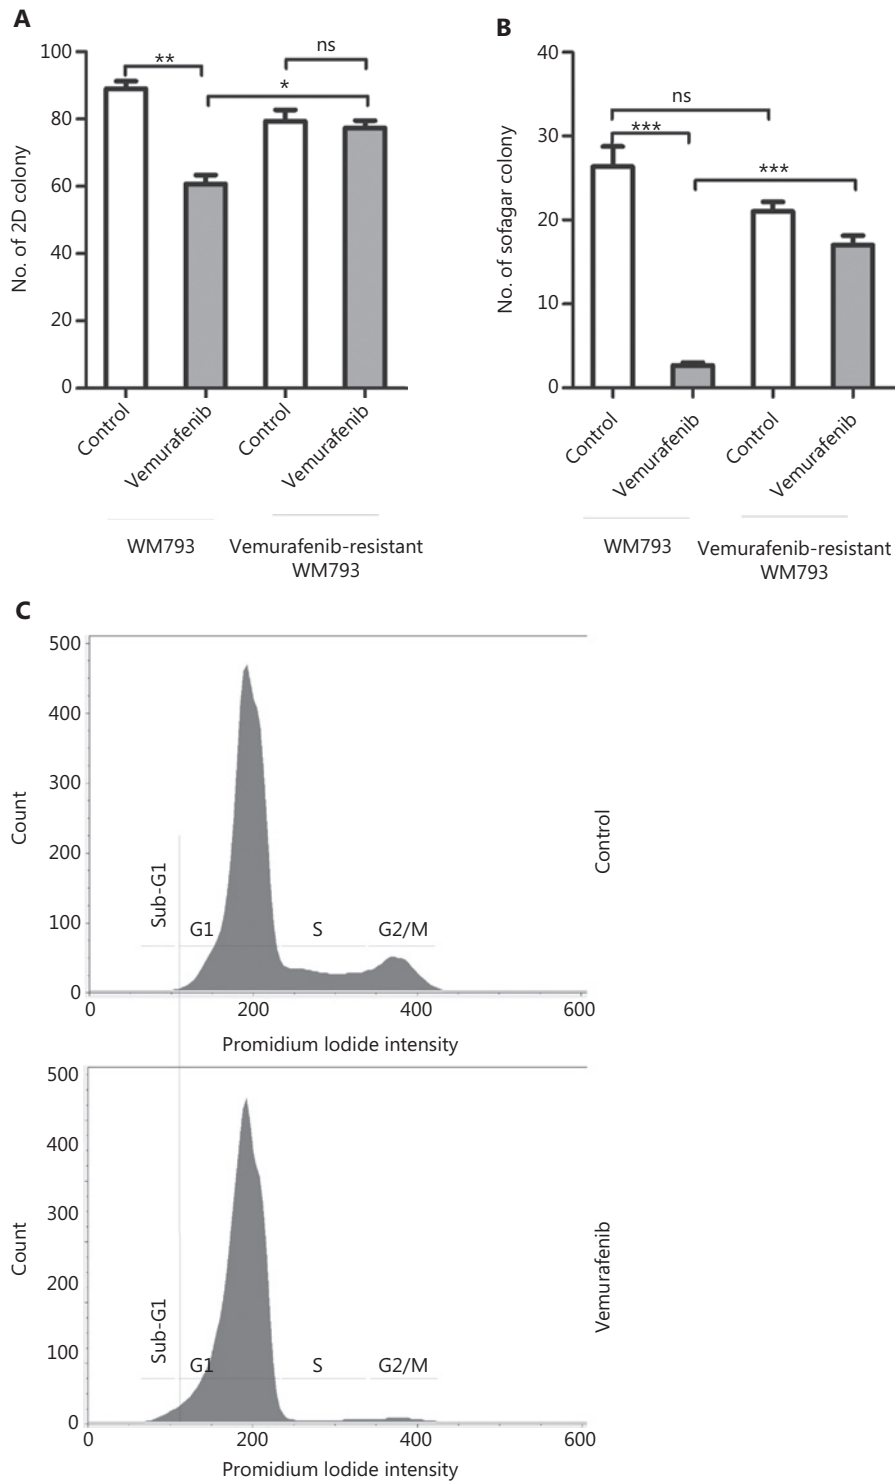

**Figure S1** Effect of vemurafenib on WM793 cell growth. (A) The effects of vemurafenib on colony formation (two-dimensional culture) in naïve and vemurafenib resistant WM793 cells. (B) The effect of vemurafenib on colony formation (soft agar; three-dimensional cultures) in naïve and vemurafenib resistant WM793 cells. (C) The effects of vemurafenib on cell cycle arrest and apoptosis in naïve WM793 cells. \* $P < 0.05$ ; \*\* $P < 0.01$ ; \*\*\* $P < 0.001$ .

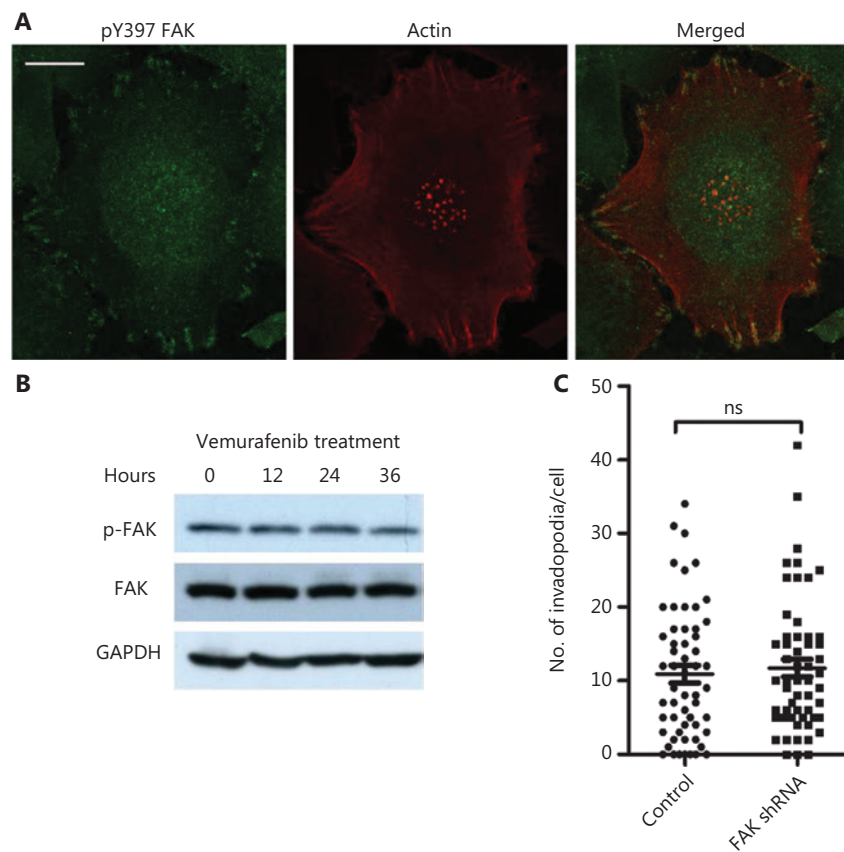

**Figure S2** FAK is not activated and is not involved in invadopodia formation. (A) Immunofluorescence staining of p-FAK and invadopodia (actin staining). Scale bars = 10  $\mu$ m. (B) Western blot analysis showed that vemurafenib treatment did not affect FAK or p-FAK levels. (C) The effect of FAK shRNA on invadopodia formation. PYK2, proline-rich tyrosine kinase 2; FAK, focal adhesion kinase; DTIC, dacarbazine; TMA, tissue microarray; OS, overall survival; PFS, progression-free survival; PBS, phosphate-buffered saline; ECM, extracellular matrix.

**Table S1** The relationships between p-Pyk2 expressions and clinicopathological parameters in 115 patients with melanomas

| Parameters      | <i>n</i> | Mean ± SEM | <i>P</i> |
|-----------------|----------|------------|----------|
| Sex             |          |            |          |
| Male            | 69       | 57.5 ± 3.0 | 0.285    |
| Female          | 46       | 52.2 ± 4.1 |          |
| Age (years old) |          |            |          |
| < 60            | 60       | 56.0 ± 3.7 | 0.780    |
| ≥ 60            | 55       | 54.7 ± 3.2 |          |
| Tumor site      |          |            |          |
| Acra            | 86       | 54.8 ± 2.8 | 0.696    |
| Non-acra*       | 29       | 57.0 ± 5.3 |          |
| Stage           |          |            |          |
| I and II        | 81       | 50.5 ± 3.1 | 0.002    |
| III and IV      | 34       | 66.9 ± 3.1 |          |
| Metastasis**    |          |            |          |
| No              | 53       | 44.2 ± 4.0 | < 0.001  |
| Yes             | 62       | 64.2 ± 2.5 |          |

\*Includes non-acral cutaneous and mucosal melanomas.

\*\*Includes metastasis at diagnosis and during the follow-up.

**Table S2** The COX regression analyses of overall survival and progression-free survival in 115 patients with melanomas

| Parameters                     | OS       |       |               | PFS      |       |               |
|--------------------------------|----------|-------|---------------|----------|-------|---------------|
|                                | <i>P</i> | RR    | 95% CI for RR | <i>P</i> | RR    | 95% CI for RR |
| Sex (female vs. male)          | 0.805    | 1.093 | 0.537–2.224   | 0.438    | 1.247 | 0.714–2.175   |
| Age (≥ 60 vs. < 60 years old)  | 0.470    | 1.297 | 0.640–2.628   | 0.844    | 1.058 | 0.602–1.861   |
| Tumor site (non-acra vs. acra) | 0.001    | 3.406 | 1.601–7.247   | 0.078    | 1.740 | 0.939–3.224   |
| Stage (III/IV vs. I/II)        | 0.008    | 2.573 | 1.284–5.153   | 0.033    | 1.879 | 1.052–3.354   |
| p-Pyk2 (high vs. low)          | 0.007    | 3.304 | 1.385–7.883   | 0.001    | 2.930 | 1.518–5.657   |
| DTIC treatment (no vs. yes)    | 0.576    | 0.794 | 0.354–1.783   | 0.716    | 1.129 | 0.588–2.168   |
| Biotherapy* (no vs. yes)       | 0.788    | 0.883 | 0.355–2.194   | 0.808    | 1.094 | 0.530–2.258   |

\*Includes treatments with IFN, IL-2, LAK, and tumor vaccine. OS, overall survival; PFS, progression-free survival; DTIC, dacarbazine.
